# Supplementary material for: Photochromic/electrochromic strain sensor with a fast and reversible light-printing ability
Source: Royal Society of Chemistry journal article supplement (doi:10.1039/d2tc05417e), 2023-01-01
Supplement: d2tc05417e3.pdf [file d2tc05417e3.pdf]

*Supporting information for*

## **Photochromic/Electrochromic Strain Sensor with a Fast and Reversible Light-Printing Ability**

Jundang Liang<sup>a†</sup>, Botian Li<sup>\*,a†</sup>, Xiaodong Gai<sup>a</sup>, Ning Li<sup>a</sup>, Jian Wang<sup>a</sup>, Yichi Zhang<sup>a</sup>,  
Qiong Zhou<sup>a</sup>, Yuchao Sun<sup>\*,b</sup>

<sup>a</sup> College of New Energy and Materials, China University of Petroleum, Beijing 102249,  
China

E-mail: botian.li@cup.edu.cn

<sup>b</sup> Auner Technology Co., Ltd., Beijing 100084, China

Email: sunych.16@pbcfs.tsinghua.edu.cn

[†] These authors contributed equally to this work.

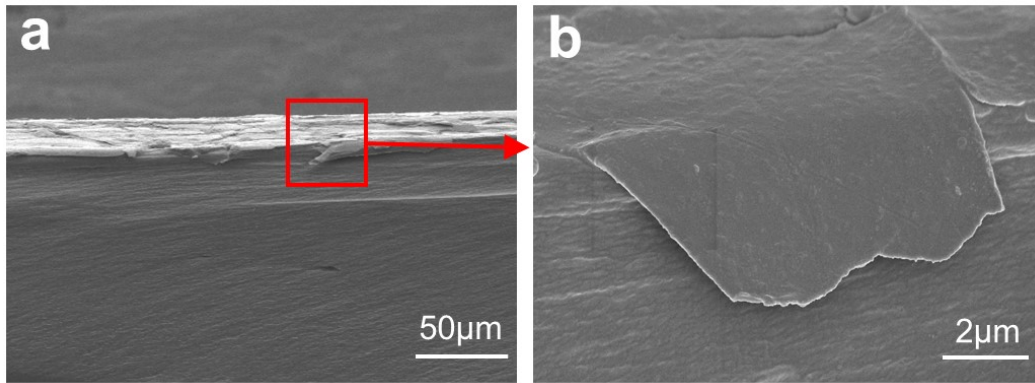

Fig. S1 SEM image of Au-sprayed ITO/PET.

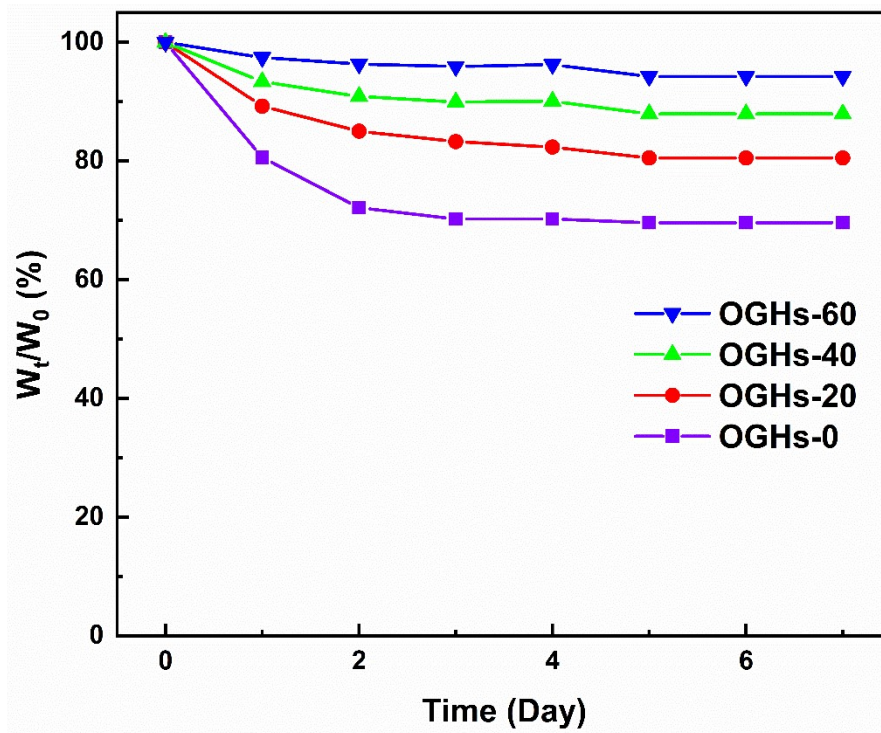

Fig. S2 The weight retention ratio curves of devices (30 °C, 50% RH).

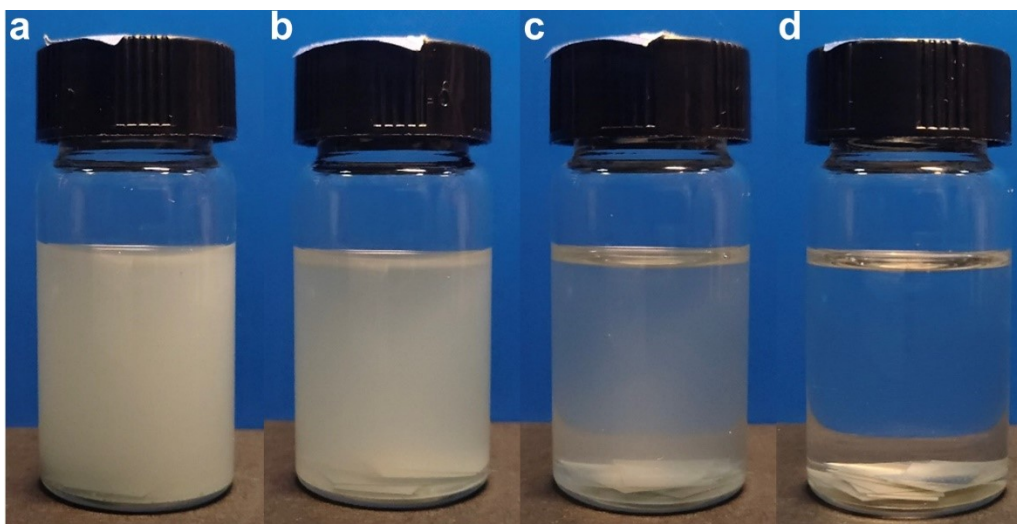

**Fig. S3** Solvation of  $\text{MoO}_{3-x}/\text{PEDOT:PSS}$  composite in PPD/ $\text{H}_2\text{O}$  solvent mixture with (a) 20 wt% PPD, (b) 40 wt% PPD, (c) 60 wt% PPD and (d) 80 wt% PPD.

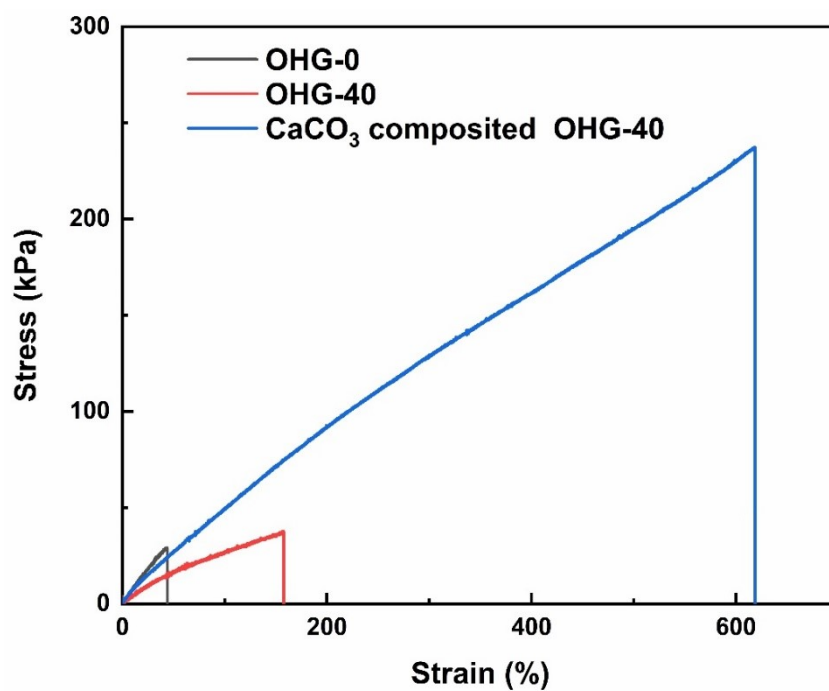

**Fig. S4** Tensile strain-stress curves of PAAM hydrogel (OHG-0), organohydrogel (OHG-40) and  $\text{CaCO}_3$  composited OHG-40.

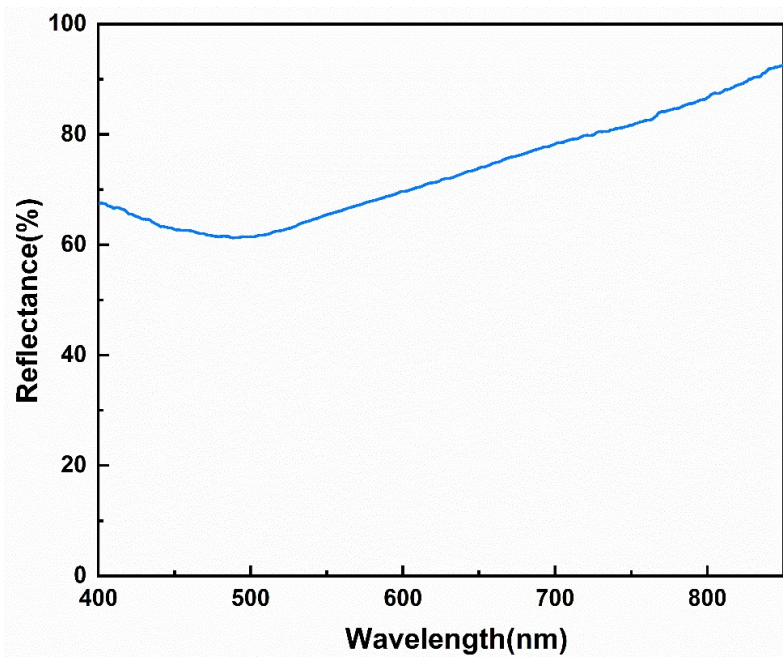

Fig. S5 UV-vis reflectance spectrum of CaCO<sub>3</sub> composited OHG-40

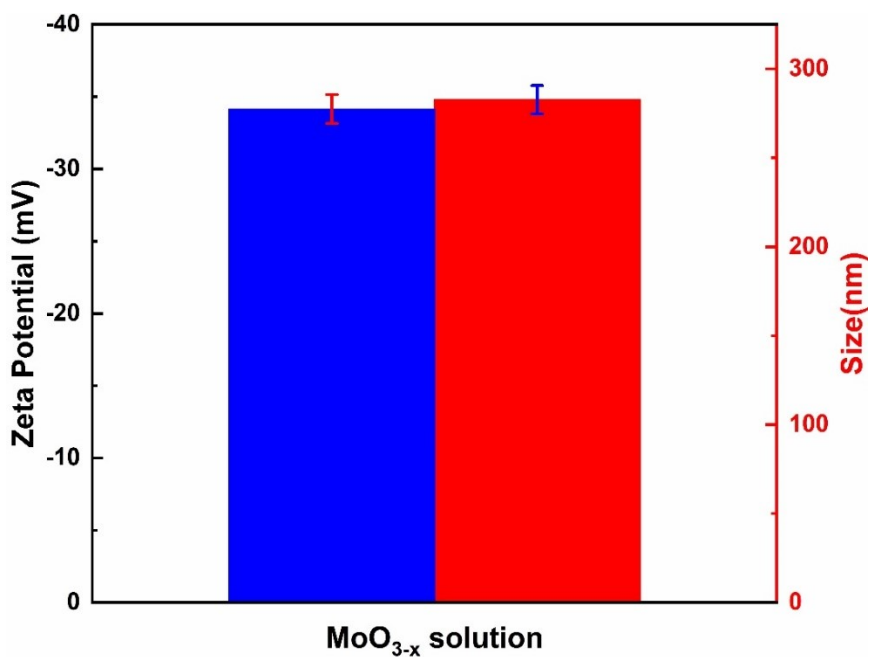

Fig. S6 Zeta potential and particle size of MoO<sub>3-x</sub> nanorods aqueous dispersion.

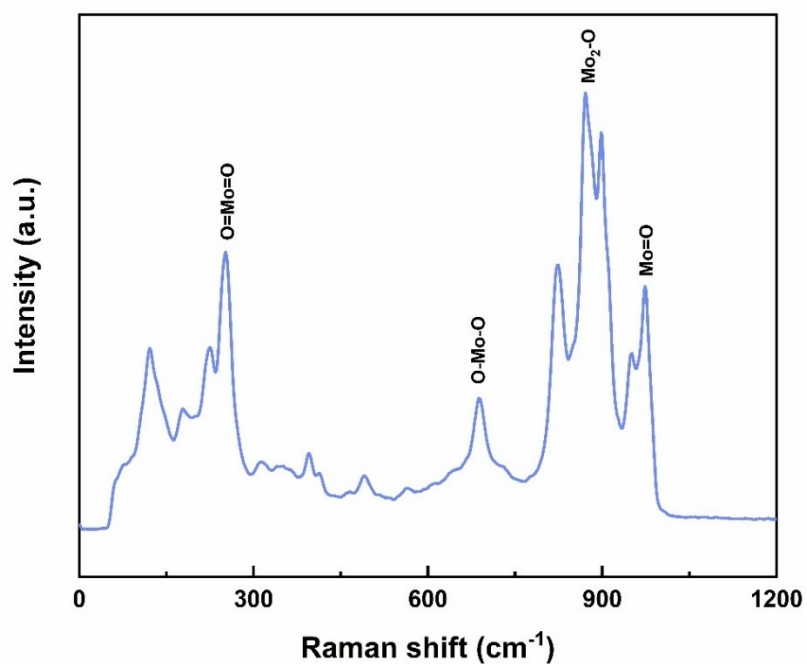

Fig. S7 Raman spectrum of MoO<sub>3-x</sub> nanorods.

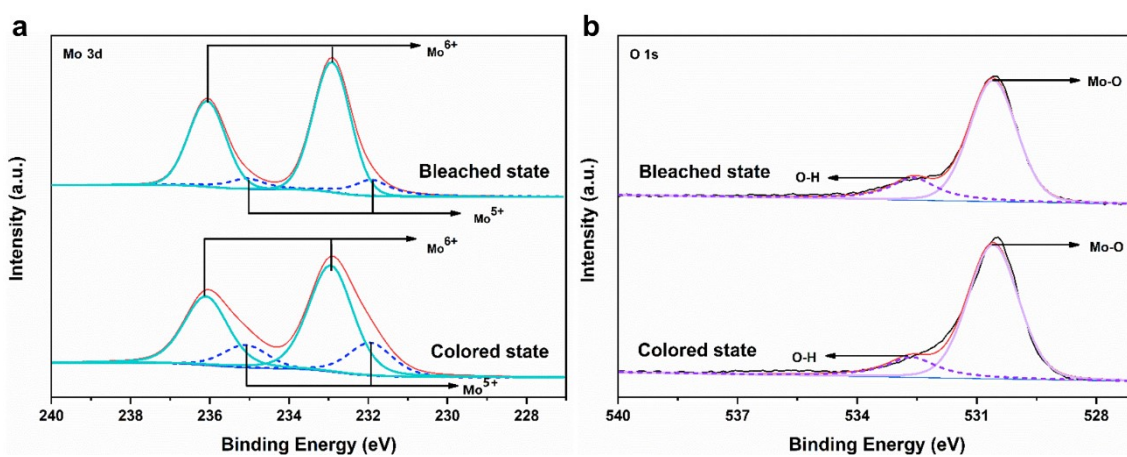

Fig. S8 XPS spectra of MoO<sub>3-x</sub> (a) Mo 3d and (b) O 1s in the bleached and colored states

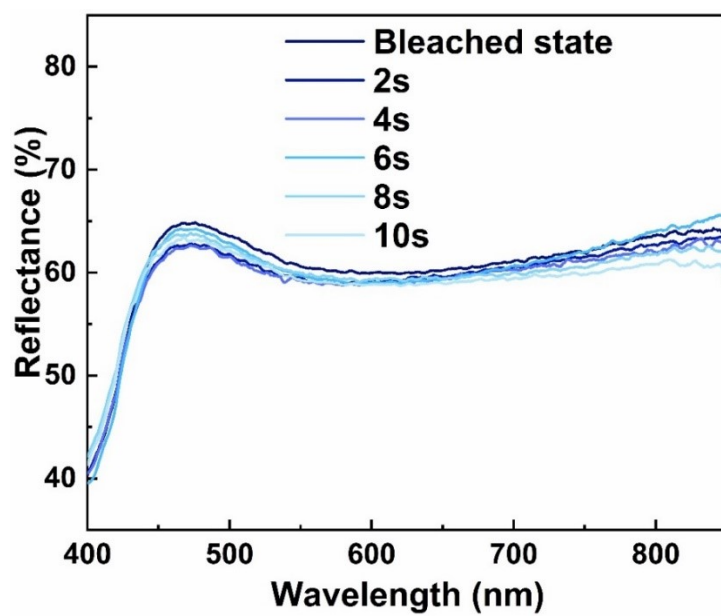

**Fig. S9** Reflectance spectra of PEDOT:PSS<sub>0</sub>-PSS upon applying bias voltage -2 V.



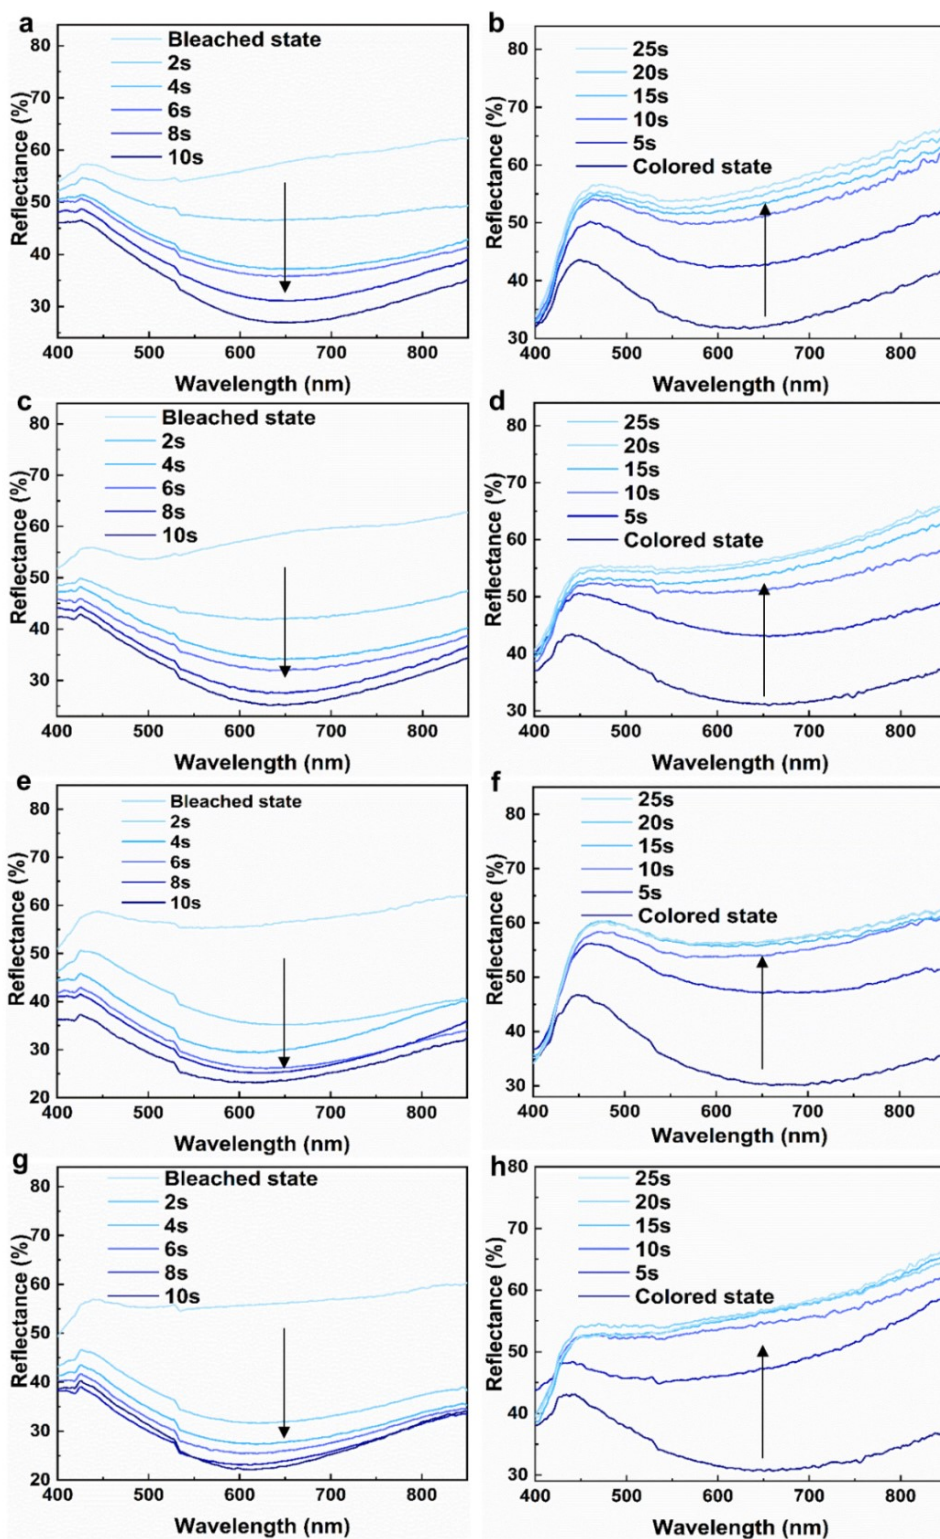

**Fig. S10** UV-vis reflectance spectra of PESSs with different PEDOT:PSS contents versus time (coloring -2 V and bleaching +2 V). Spectra of PEDOT:PSS<sub>3,4</sub>-PESS during (a) coloring and (b) bleaching process; spectra of PEDOT:PSS<sub>5,0</sub>-PESS during (c) coloring and (d) bleaching process; spectra of PEDOT:PSS<sub>8,4</sub>-PESS during (e) coloring and (f) bleaching process; spectra of PEDOT:PSS<sub>10,1</sub>-PESS during (g) coloring and (h) bleaching process.

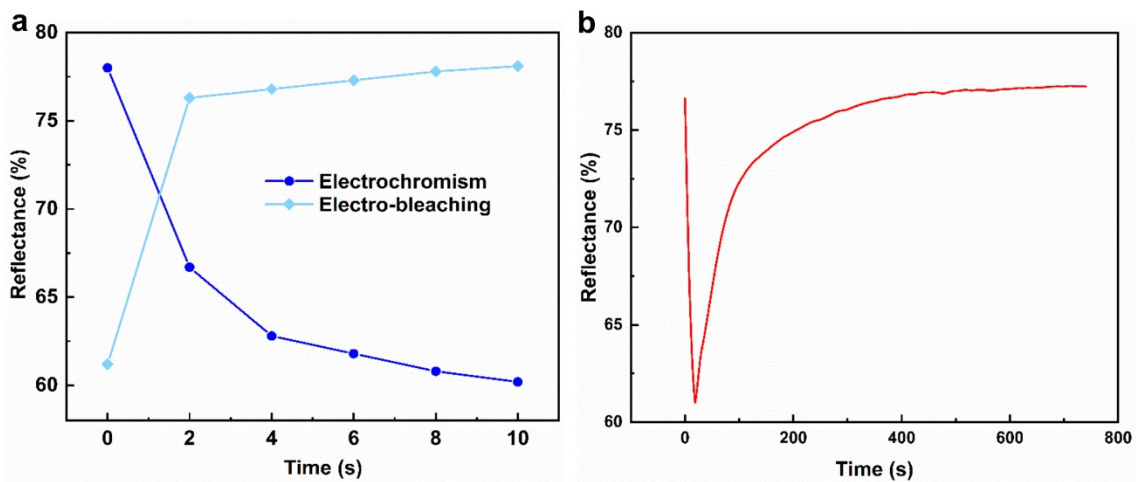

**Fig. S11** (a) The time-reflectance curves of PESS at 650 nm with pure PEDOT:PSS (coloring -2 V and bleaching +2 V); (b) the time-reflectance curves of PESS with pure PEDOT:PSS during self-fading.

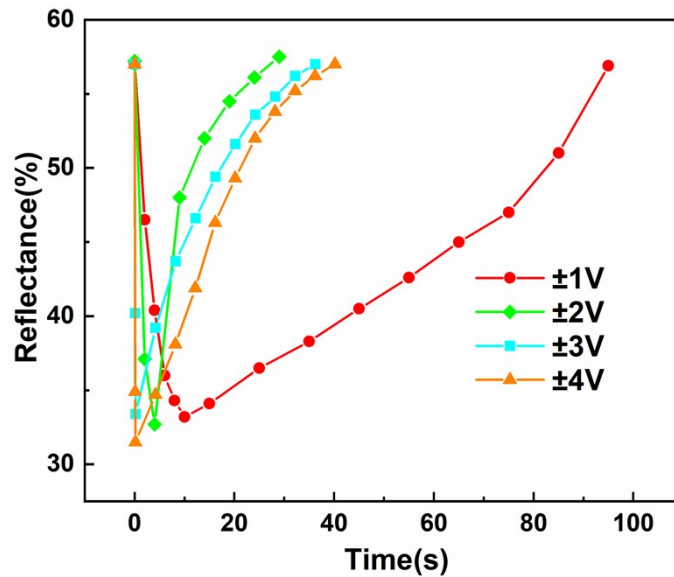

**Fig. S12** Reflectance of PEDOT:PSS<sub>6.7</sub>-PESS at 650 nm with applying different bias voltages.



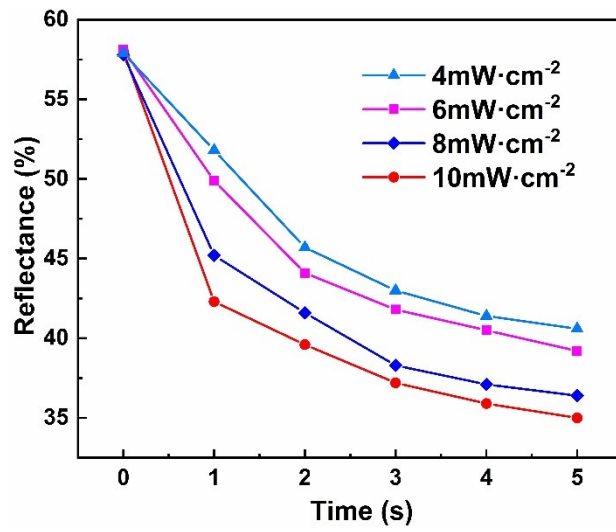

**Fig. S13** Reflectance curves of PEDOT:PSS<sub>6.7</sub>-PSS at 650 nm upon UV irradiation with different power density.

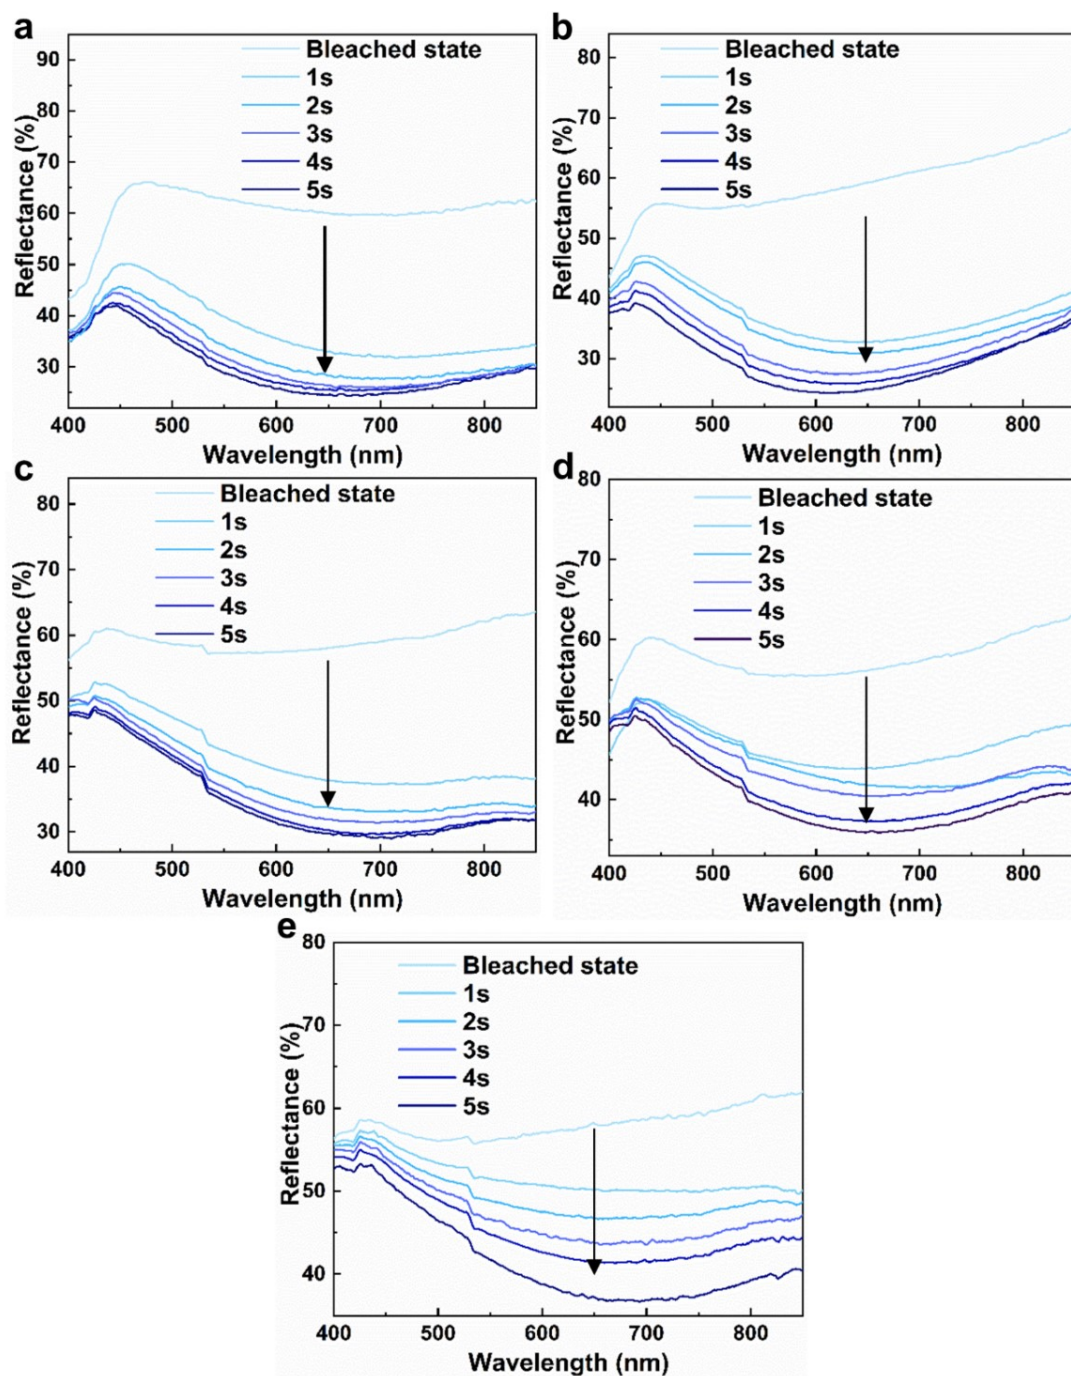

**Fig. S14** UV-vis reflectance spectra of PESSs with different PEDOT:PSS contents upon  $10 \text{ mW/cm}^2$  UV irradiation. (a) PEDOT:PSS<sub>0</sub>-PESS, (b) PEDOT:PSS<sub>3,4</sub>-PESS, (c) PEDOT:PSS<sub>5,0</sub>-PESS, (d) PEDOT:PSS<sub>8,4</sub>-PESS, (e) PEDOT:PSS<sub>10,1</sub>-PESS.

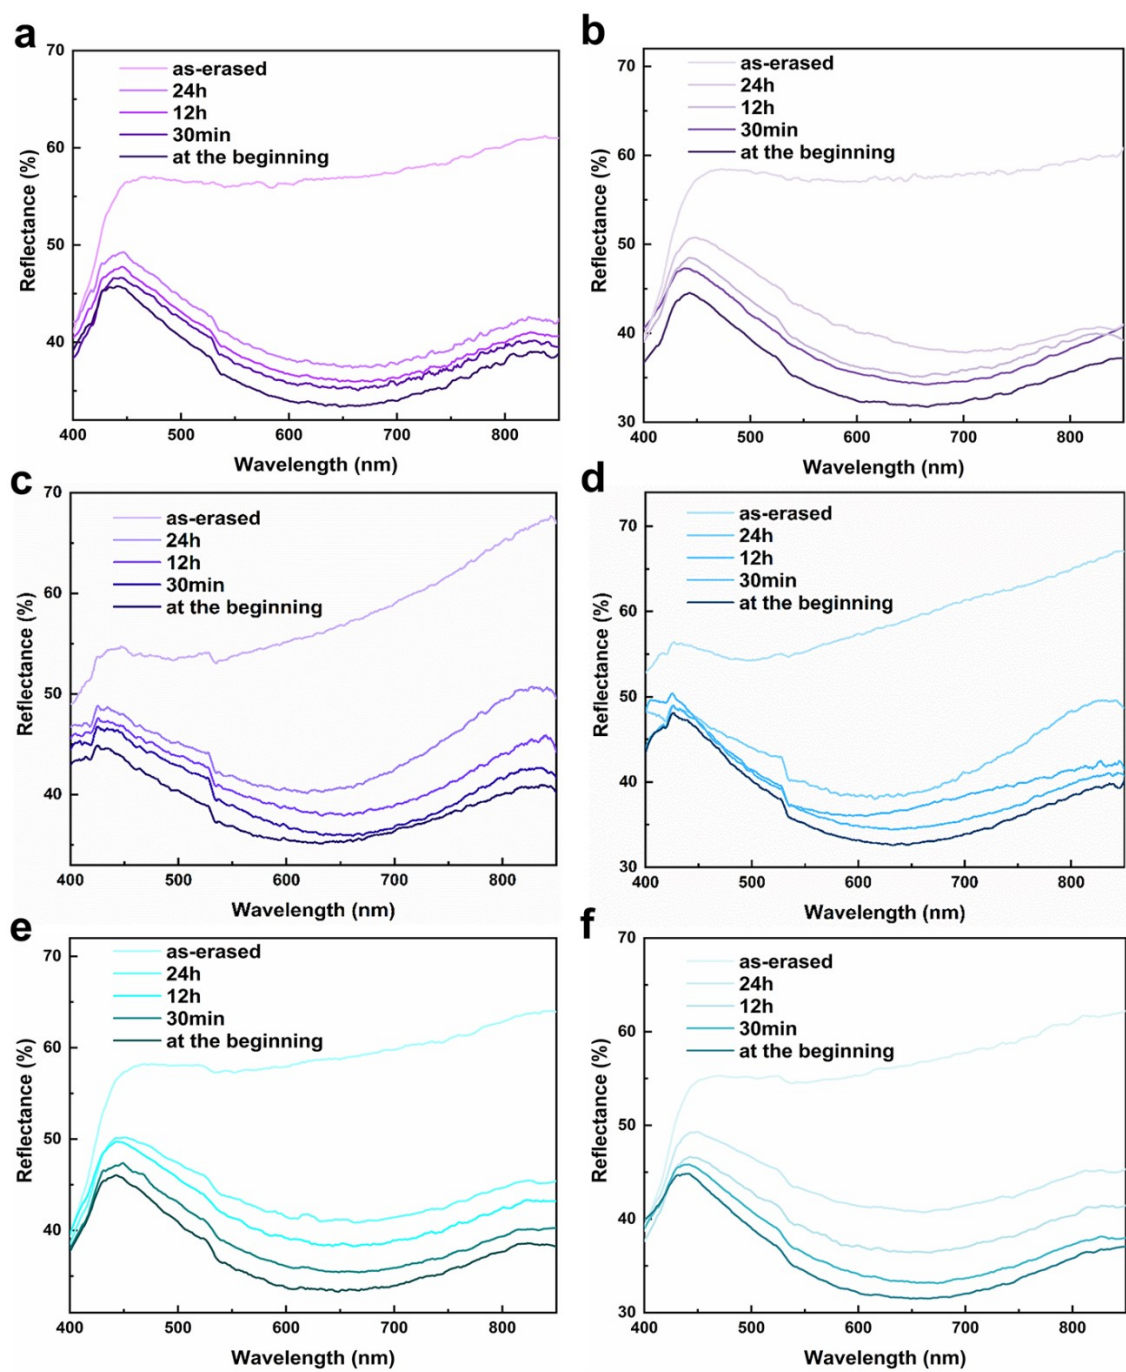

**Fig. S15** UV-vis reflectance spectra of PEDOT:PSS<sub>6.7</sub>-PSS stored at 0 °C after (a) UV irradiation (10 mW/cm<sup>2</sup>, 5 s) or (b) applying bias voltage (-2 V, 4 s); stored at 25 °C after (c) UV irradiation (10 mW/cm<sup>2</sup>, 5 s) or (d) bias voltage (-2 V, 4 s); stored at 40 °C after (e) UV irradiation (10 mW/cm<sup>2</sup>, 5 s) and (f) applied bias voltages (-2 V, 4s).

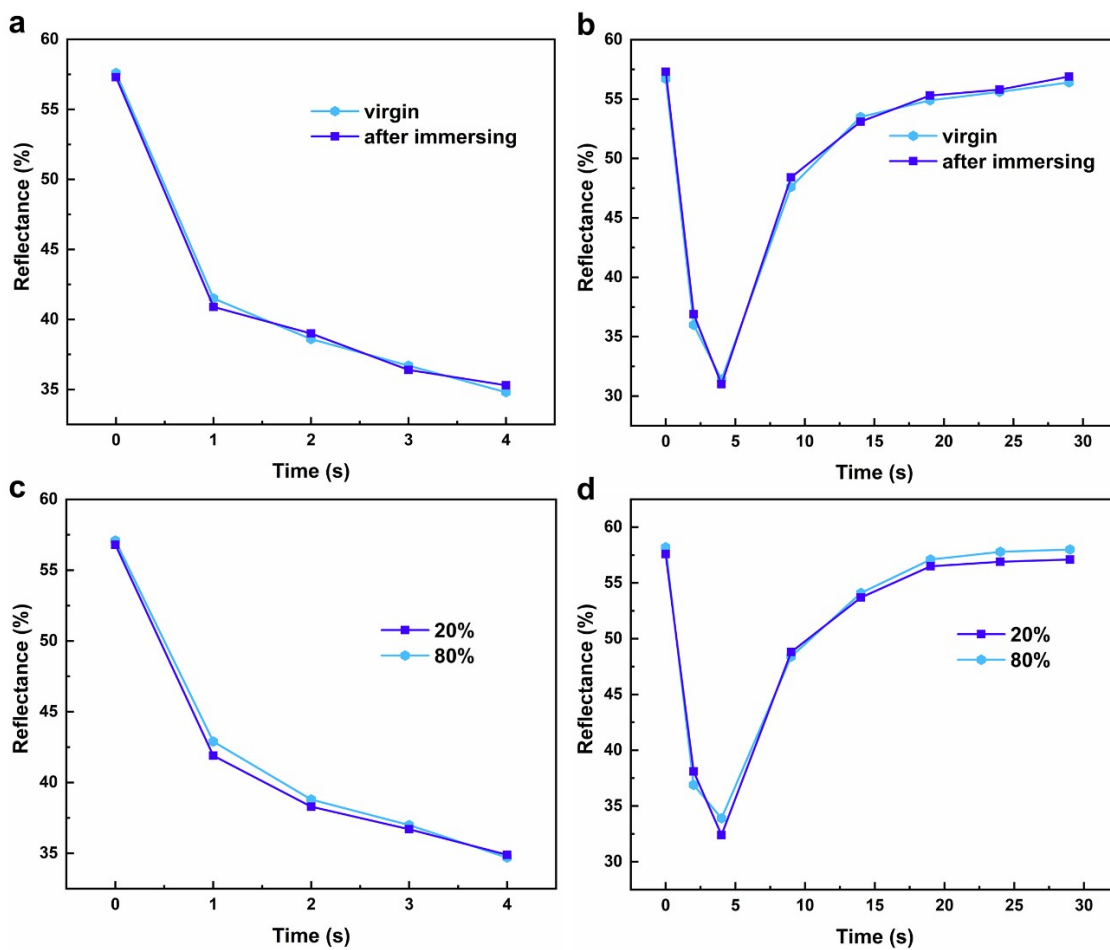

**Fig. S16** Time-dependent reflectance of PEDOT:PSS<sub>6.7</sub>-PSS at 650 nm before and after immersion in water for 5 min with (a) UV irradiation (10 mW/cm<sup>2</sup>, 5 s) and (b) applying bias voltage ( $\pm 2$  V); time-dependent reflectance of PEDOT:PSS<sub>6.7</sub>-PSS at 650 nm under different relative humidities with (c) UV irradiation (10 mW/cm<sup>2</sup>, 5 s) and (d) applying bias voltages ( $\pm 2$  V).

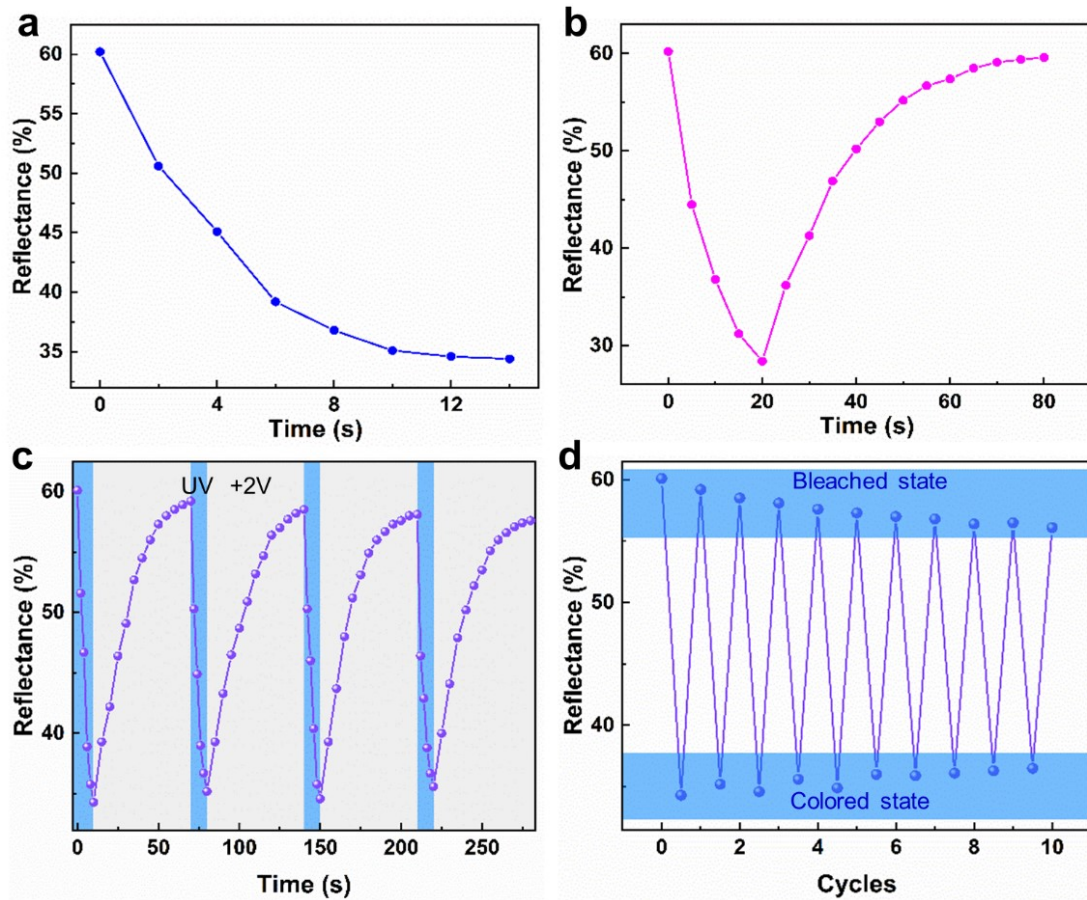

**Fig. S17** Reflectance of PEDOT: PSS<sub>6.7</sub>-PSS at 650 nm during (a) coloring process and (b) bleaching process (-15 °C, ±2 V), and cyclic experiment of light printing and electroerasing (+2 V, 60 s) for (c) 4 and (d) 10 cycles.

**Table S1.** The conductivity of devices with different components

| No. | Components of the device                                         | Conductivity ( $\times 10^{-3}$ mS/cm) |
|-----|------------------------------------------------------------------|----------------------------------------|
| 1   | ITO+OHG-40+ITO                                                   | 2.5                                    |
| 2   | ITO+MoO <sub>3</sub> +OHG-40+ITO                                 | 0.3                                    |
| 3   | ITO+MoO <sub>3-x</sub> +OHG-40+Au+ITO                            | 1.7                                    |
| 4   | ITO+ PEDOT:PSS <sub>6.7</sub> /MoO <sub>3-x</sub> +OHG-40+Au+ITO | 5.5                                    |



**Table S2.** Freezing point and electrical conductivity of Organohydrogels

| Sample | Freezing point(°C) | Conductivity( $\times 10^{-2}$ mS/cm ) |
|--------|--------------------|----------------------------------------|
| OHG-0  | 0                  | 3.44                                   |
| OHG-20 | -7                 | 1.75                                   |
| OHG-40 | -18                | 1.02                                   |
| OHG-60 | -23                | 0.30                                   |

**Table S3.** Inoic conductivity of PEDOT:PSS<sub>y</sub>-PESS

| No. | Device                          | Conductivity( $\times 10^{-3}$ mS/cm ) |
|-----|---------------------------------|----------------------------------------|
| 1   | PEDOT:PSS <sub>3,4</sub> -PESS  | 0.1                                    |
| 2   | PEDOT:PSS <sub>5,0</sub> -PESS  | 2.8                                    |
| 3   | PEDOT:PSS <sub>6,7</sub> -PESS  | 5.5                                    |
| 4   | PEDOT:PSS <sub>8,4</sub> -PESS  | 7.1                                    |
| 5   | PEDOT:PSS <sub>10,1</sub> -PESS | 7.9                                    |

**Table S4.** The reported various color-changing devices and their performance

| Device                                                    | Component                                                                         | Performance                                                   | Application                                        | Ref.         |
|-----------------------------------------------------------|-----------------------------------------------------------------------------------|---------------------------------------------------------------|----------------------------------------------------|--------------|
| Photochromic/Electrochromic Strain Sensor                 | ITO/MoO <sub>3</sub> /<br>x/PEDOT:PSS/<br>organohydrogel                          | Photochromism;<br>electrochromism;<br>Strain sensor           | Wearable devices<br>with light printing<br>ability | This<br>work |
| All-Transparent Stretchable Electrochromic Supercapacitor | PDMS/ WO <sub>3</sub> /<br>PEDOT:PSS/<br>hydrogel                                 | Electrochromism;<br>Supercapacitance                          | Wearable<br>supercapacitor                         | 1            |
| Photochromic and Electrochromic Hydrogels                 | ITO/Thienoviologens/<br>hydrogel                                                  | Photochromism;<br>Electrochromism                             | Anticounterfeiting<br>materials; smart<br>window   | 2            |
| A highly-safe supercapacitor                              | Gel/electrochromic<br>pseudocapacitance<br>materials/transparent<br>architectures | Supercapacitor;<br>electrochromism;<br>thermal responsiveness | Energy storage<br>devices                          | 3            |



---

## Notes and references

1. T. G. Yun, M. Park, D.-H. Kim, D. Kim, J. Y. Cheong, J. G. Bae, S. M. Han and I.-D. Kim, *ACS Nano*, 2019, **13**, 3141-3150.
2. M. Chang, D. Liang, F. Zhou, H. Xue, H. Zong, W. Chen and G. Zhou, *ACS Appl. Mater. Interfaces*, 2022, **14**, 15448-15460.
3. H. Peng, H. Wang, Y. Wang, X. Wang, S. Chen and B. Yan, *J. Mater. Chem. A*, 2022, **10**, 20302-20311.
